# Supplementary material for: Use of Dietary Management in Irritable Bowel Syndrome: Results of a Survey of Over 1500 United States Gastroenterologists
Source: PubMed Central journal article supplement — J Neurogastroenterol Motil. 2018 Jul 1;24(3):437–46. doi: 10.5056/jnm17116 (PMC6034671; doi:10.5056/jnm17116), 2018-07-01
Supplement: jnm-24-437_appendix.pdf [file jnm-24-437_appendix.pdf]

## Appendix

---

### Dietary Management of Irritable Bowel Syndrome: Utilization by United States Gastroenterologists

Q1 Are you a:

- Board Certified/Eligible Gastroenterologist (1)
- Fellow-in-training (2)

Answer if are you a: board certified/eligible gastroenterologist is selected

Q2 Years out from GI training:

- Less than 1 year (1)
- 1-5 years (2)
- 6-10 years (3)
- 11-15 years (4)
- 16-20 years (5)
- Over 20 years (6)

Q3 What is your primary practice site?

- Academic (1)
- Multi-specialty Group (2)
- GI Solo (3)
- VA (4)

Q4 What percentage of your outpatient clinic time is spent treating patients with IBS?

- Less than 10% (1)
- 10-25% (2)
- 26-50% (3)
- 51-75% (4)
- More than 75% (5)

Q5 How often do your patients link food intake to their bowel symptoms (either onset or exacerbation)?

- Almost never (1)
- Rarely (2)
- Sometimes (3)
- Usually (4)
- Almost always (5)

Q6 How often do your patients self-manage their IBS prior to a visit with you?

- Almost never (1)
- Rarely (2)
- Sometimes (3)
- Usually (4)
- Almost always (5)

Q7 How often will your patients have tried the following diets before you see them?

|                     | Almost never (1)         | Rarely (2)               | Sometimes (3)            | Usually (4)              | Almost always (5)        |
|---------------------|--------------------------|--------------------------|--------------------------|--------------------------|--------------------------|
| Trial and error (1) | <input type="checkbox"/> |
| Lactose-free (2)    | <input type="checkbox"/> |
| Gluten-free (3)     | <input type="checkbox"/> |
| Fat-free (4)        | <input type="checkbox"/> |
| FODMAP (5)          | <input type="checkbox"/> |

Q8 In what percentage of your patients do you recommend dietary therapy into the treatment of your IBS patients?

- Less than 10% (1)
- 10-25% (2)
- 26-50% (3)
- 51-75% (4)
- More than 75% (5)

Q9 How important are each of the following factors in your decision to recommend dietary therapy for patients with IBS?

|                                                             | Not important (1)        | Not very important (2)   | Somewhat important (3)   | Important (4)            | Very important (5)       |
|-------------------------------------------------------------|--------------------------|--------------------------|--------------------------|--------------------------|--------------------------|
| Evidence supporting dietary therapy (1)                     | <input type="checkbox"/> |
| Time needed to provide counseling (3)                       | <input type="checkbox"/> |
| Access to registered dietitians knowledgeable about IBS (5) | <input type="checkbox"/> |

Q10 How often do you recommend the following diets to your IBS patients?

|                       | Almost never (1)         | Rarely (2)               | Sometimes (3)            | Usually (4)              | Almost always (5)        |
|-----------------------|--------------------------|--------------------------|--------------------------|--------------------------|--------------------------|
| Lactose-Free (1)      | <input type="checkbox"/> |
| Gluten-Free (2)       | <input type="checkbox"/> |
| FODMAP restricted (3) | <input type="checkbox"/> |
| High Fiber (4)        | <input type="checkbox"/> |
| Low Fat (5)           | <input type="checkbox"/> |

If Never Is Equal to 5, Then Skip To How do you deliver nutritional advice...

Answer if how often do you recommend the following diets to your IBS patients? - never is greater than 0

Q11 How often do you find the following diets effective for the treatment of IBS?

|                       | Very Ineffective (1)     | Somewhat Effective (2)   | Neither Effective nor Ineffective (3) | Somewhat Effective (4)   | Very Effective (5)       |
|-----------------------|--------------------------|--------------------------|---------------------------------------|--------------------------|--------------------------|
| Lactose-Free (1)      | <input type="checkbox"/> | <input type="checkbox"/> | <input type="checkbox"/>              | <input type="checkbox"/> | <input type="checkbox"/> |
| Gluten-Free (2)       | <input type="checkbox"/> | <input type="checkbox"/> | <input type="checkbox"/>              | <input type="checkbox"/> | <input type="checkbox"/> |
| FODMAP restricted (3) | <input type="checkbox"/> | <input type="checkbox"/> | <input type="checkbox"/>              | <input type="checkbox"/> | <input type="checkbox"/> |
| High Fiber (4)        | <input type="checkbox"/> | <input type="checkbox"/> | <input type="checkbox"/>              | <input type="checkbox"/> | <input type="checkbox"/> |
| Low Fat (5)           | <input type="checkbox"/> | <input type="checkbox"/> | <input type="checkbox"/>              | <input type="checkbox"/> | <input type="checkbox"/> |

Q12 Which best describes the role of dietary therapy in the management of your patients with IBS?

- Primary therapy (1)
- Secondary therapy (adjunctive or if other options have failed) (2)
- Not incorporating dietary therapy (3)

Q13 How would you rate the efficacy of dietary therapy for IBS in comparison with other treatments available?

- Much worse (1)
- Worse (2)
- About the same (3)
- Better (4)
- Much better (5)

Q14 How comfortable are you in providing counseling about dietary therapy in your IBS patients?

- Not at all comfortable (1)
- Not very comfortable (2)
- Somewhat comfortable (3)
- Comfortable (4)
- Very comfortable (5)

Q15 How often do you find the following to be barriers to dietary intervention for your IBS patients?

|                                             | Almost never (1)         | Rarely (2)               | Sometimes (3)            | Usually (4)              | Almost always (5)        |
|---------------------------------------------|--------------------------|--------------------------|--------------------------|--------------------------|--------------------------|
| Complexity of diet (1)                      | <input type="checkbox"/> |
| Expense of the diet (3)                     | <input type="checkbox"/> |
| Insurance coverage for dietitian visits (4) | <input type="checkbox"/> |
| Diet-specific recipes (5)                   | <input type="checkbox"/> |
| Patient interest (6)                        | <input type="checkbox"/> |
| Meal preparation time (7)                   | <input type="checkbox"/> |

Q16 How do you deliver nutritional advice to your IBS patients? Select all that apply.

- Educational handouts (1)
- Educational website (2)
- Book (3)
- Verbal only (4)
- Refer to a dietitian (5)
- App for smart phone/tablet device (6)

Q17 To whom do you refer your IBS patients for nutrition counseling?

- General dietitian outside of your GI group (1)
- General dietitian within your GI group (2)
- Specialized GI dietitian outside of your group (3)
- Specialized GI dietitian within of your group (4)

Q18 How often do you refer your IBS patients to a registered dietitian (RD)?

- Almost never (1)
- Rarely (2)
- Sometimes (3)
- Usually (4)
- Almost always (5)

Q19 How often do you include a specific diet recommendation when referring to an RD?

- Almost never (1)
- Rarely (2)
- Sometimes (3)
- Usually (4)
- Almost always (5)

Q20 How often do you reassess symptom response to dietary recommendations after you refer a patient to an RD?

- Almost never (1)
- Rarely (2)
- Sometimes (3)
- Usually (4)
- Almost always (5)

Q21 Who follows up your IBS patients after dietary education? Select all that apply.

- Myself (1)
- Registered dietitian (2)
- Advanced practice provider (APP) (3)
- PCP (4)

Q22 What steps would enhance the delivery of dietary therapy to your patients? Select all that apply.

- Nutrition classes for patients (1)
- Educational websites (2)
- Written handouts (3)
- CME courses to train GI physicians (4)
- Availability of registered dietitians with an IBS focus (5)
- Payer coverage of dietary consults and therapy (6)
- App for smart phone/tablet device (7)
- Other; please specify: (8) \_\_\_\_\_

Q23 If you are randomly selected for one of the amazon.com gift cards, how would you prefer to be notified?

- Email: (1) \_\_\_\_\_
- Phone: (2) \_\_\_\_\_
